# Supplementary material
Source: PubMed Central journal article supplement (PMC1904152)

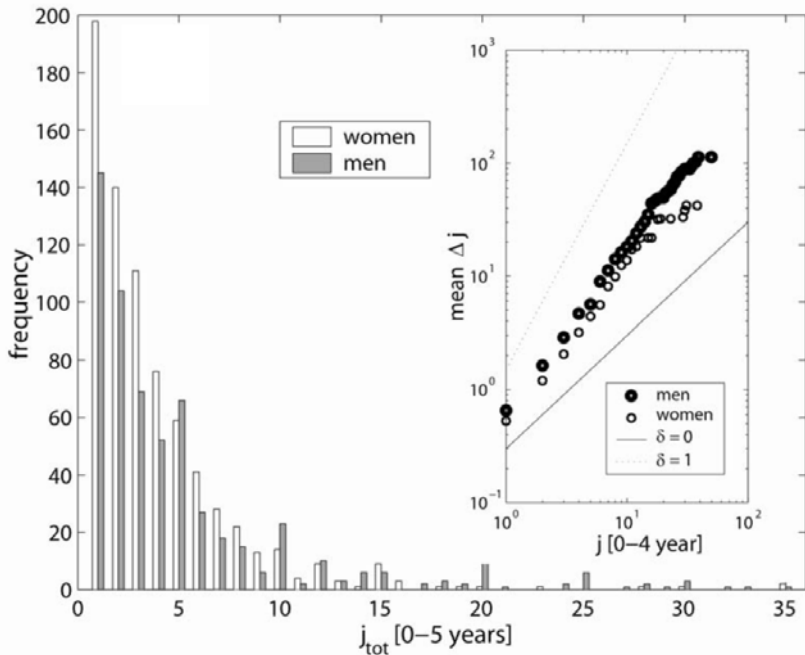

Supplement: pnas_0611337104_1.pdf [file pnas_0611337104_1.pdf]

# WOMEN 5 year

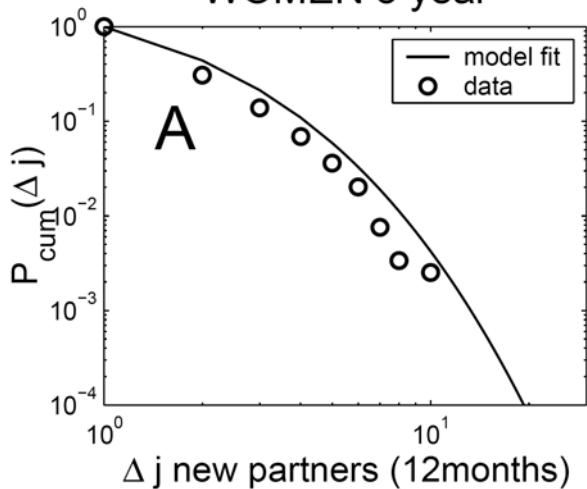

# MEN 5 year

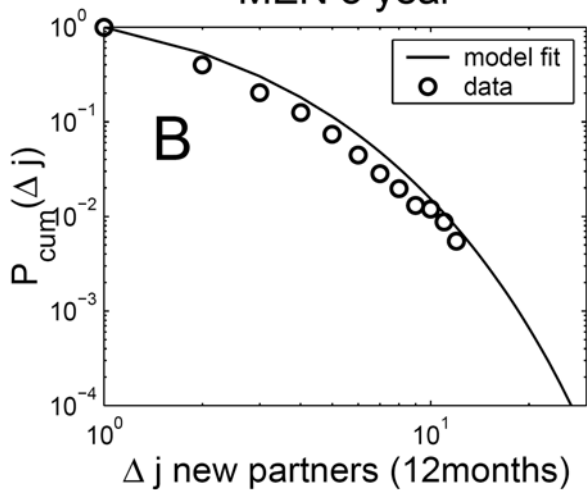

Supplement: pnas_0611337104_2.pdf [file pnas_0611337104_2.pdf]

# WOMEN 5 year

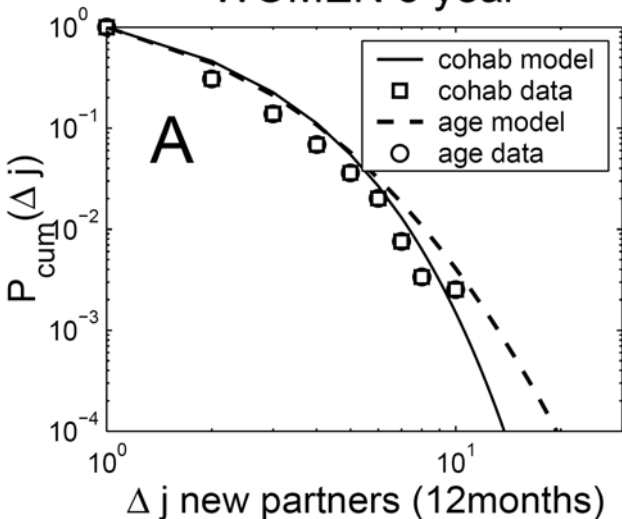

# MEN 5 year

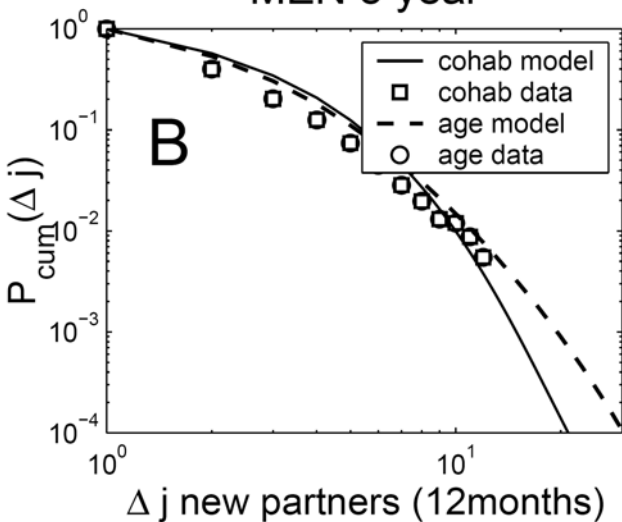

Supplement: pnas_0611337104_3.pdf [file pnas_0611337104_3.pdf]
